# Supplementary material
Source: Springer Nature journal article supplement (https://www.springermedizin.de/resource/supplementary/13037_2011_102_MOESM4_ESM.pdf/9659322)
Supplement: MOESM4 [file 9659322]

$$A = \pi \times r^2$$

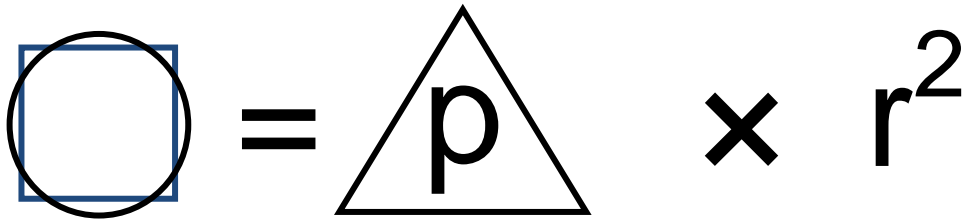

A diagram illustrating the area formula for a circle. It shows a circle inscribed within a square, followed by an equals sign, a triangle containing the letter 'p', a multiplication sign, and the expression  $r^2$ .

$$\text{Circle in Square} = p \times r^2$$
